# Supplementary material for: Maxillomandibular Advancement and Upper Airway Stimulation for Treatment of Obstructive Sleep Apnea: A Systematic Review
Source: MDPI journal article supplement (doi:10.3390/jcm11226782), 2022-11-16
Supplement: s1 [file s1]

## Supplementary Materials

**Table S1** (a). Search strategy in MEDLINE database. (b) Search strategy in Embase database

| <b>(a) Ovid MEDLINE(R) ALL &lt;1946 to Dec 14, 2021&gt;</b>   |                                                                                                                                                                                                                                                                                                                                                       |               |
|---------------------------------------------------------------|-------------------------------------------------------------------------------------------------------------------------------------------------------------------------------------------------------------------------------------------------------------------------------------------------------------------------------------------------------|---------------|
| <b>Step</b>                                                   | <b>Search</b>                                                                                                                                                                                                                                                                                                                                         | <b>Result</b> |
| <b>1</b>                                                      | exp Sleep Apnea Syndromes/ or Snoring/ or ((sleep adj3 (apnea or apnoea or hypopnea or hypopnoea)) or (upper adj airway adj resistance) or (sleep adj disordered adj breathing) or snore or snoring).ti,ab,kf,ot.                                                                                                                                     | 54852         |
| <b>2</b>                                                      | (mma or ((maxillomandibular or mandibular) adj2 advancement) or ((bimaxillar or orthognathic) adj2 surgery) or maxillary-osteomy or (multilevel or multi-level)).ti,ab,kf.                                                                                                                                                                            | 51520         |
| <b>3</b>                                                      | 'Electric Stimulation Therapy'/ or 'Electric Stimulation'/ or 'implantable Neurostimulators'/ or (((hypoglossal-nerve* or nervus-hypoglossus or cranial-nerve* or (XII adj nerve*)) adj2 (stimulat* or surgery or therap*)) or (upper-airway adj stimulat*) or Neurostimulat* or (implantable-nerve adj stimulat*) or electrical-stimulat*).ti,ab,kf. | 52389         |
| <b>4</b>                                                      | 2 or 3                                                                                                                                                                                                                                                                                                                                                | 103811        |
| <b>5</b>                                                      | 1 and 4                                                                                                                                                                                                                                                                                                                                               | 1972          |
| <b>(b) Embase Classic+Embase &lt;1947 to Dec 14, 2021&gt;</b> |                                                                                                                                                                                                                                                                                                                                                       |               |
| <b>Step</b>                                                   | <b>Search</b>                                                                                                                                                                                                                                                                                                                                         | <b>Result</b> |
| <b>1</b>                                                      | exp 'snoring'/ or exp 'sleep disordered breathing'/ or (sleep adj3 (apnea or apnoea or hypopnea or hypopnoea)).ti,ab. or 'upper airway resistance'.ti,ab. or 'sleep disordered breathing'.ti,ab. or snor*.ti,ab.                                                                                                                                      | 97390         |
| <b>2</b>                                                      | (mma or ((maxillomandibular or mandibula) adj2 advancement) or bimaxillar-surgery or maxillary-osteomy or orthognathic-surgery).ti,ab,kw.                                                                                                                                                                                                             | 8129          |
| <b>3</b>                                                      | (multilevel or multi-level).ti,ab,kw.                                                                                                                                                                                                                                                                                                                 | 49506         |
| <b>4</b>                                                      | exp electrostimulation/ or exp 'nerve stimulator'/                                                                                                                                                                                                                                                                                                    | 101629        |
| <b>5</b>                                                      | ((((hypoglossal-nerve* or nervus-hypoglossus or cranial-nerve* or (XII adj nerve*)) adj2 (stimulat* or surgery or therap*)) or (upper-airway adj stimulat*) or Neurostimulat* or (implantable-nerve adj stimulat*) or electrical-stimulat*).ti,ab,kw.                                                                                                 | 71405         |
| <b>6</b>                                                      | 2 or 3 or 4 or 5                                                                                                                                                                                                                                                                                                                                      | 190441        |
| <b>7</b>                                                      | 1 and 6                                                                                                                                                                                                                                                                                                                                               | 2037          |
| <b>8</b>                                                      | (exp experimental organism/ or animal tissue/ or animal cell/ or exp animal disease/ or exp carnivore disease/ or exp bird/ or exp experimental animal welfare/ or exp animal husbandry/ or animal behavior/ or exp animal cell culture/ or exp mammalian disease/ or exp mammal/ or exp marine species/ or nonhuman/ or animal.hw.) not human/       | 7698484       |
| <b>9</b>                                                      | 7 not 8                                                                                                                                                                                                                                                                                                                                               | 1960          |
| <b>10</b>                                                     | limit 9 to (conference abstracts or embase)                                                                                                                                                                                                                                                                                                           | 1775          |

**Table S2.** (a) Methodological appraisal of the individual studies according to MINORS assessment tool – maxillomandibular advancement surgery. (b) Methodological appraisal of the individual studies according to MINORS assessment tool – upper airway stimulation

| (a)                          |    |    |    |    |    |    |    |    |    |     |     |     |             |         |
|------------------------------|----|----|----|----|----|----|----|----|----|-----|-----|-----|-------------|---------|
|                              | Q1 | Q2 | Q3 | Q4 | Q5 | Q6 | Q7 | Q8 | Q9 | Q10 | Q11 | Q12 | Total score | Quality |
| Bettega et al. 2000 [28]     | 2  | 2  | 0  | 2  | 1  | 2  | 2  | 0  |    |     |     |     | 11          | Fair    |
| Bianchi et al. 2014 [29]     | 2  | 2  | 0  | 2  | 1  | 2  | 0  | 0  |    |     |     |     | 9           | Fair    |
| Boyd et al. 2015 [30]        | 2  | 2  | 2  | 2  | 1  | 2  | 0  | 2  |    |     |     |     | 13          | High    |
| Conradt et al. 1997 [31]     | 2  | 2  | 0  | 2  | 1  | 2  | 2  | 0  |    |     |     |     | 11          | Fair    |
| Gerbino et al. 2014 [32]     | 2  | 2  | 2  | 2  | 1  | 2  | 2  | 0  |    |     |     |     | 13          | High    |
| Goh et al. 2003 [33]         | 2  | 2  | 2  | 2  | 0  | 2  | 2  | 0  |    |     |     |     | 12          | Fair    |
| Goodday et al. 2016 [34]     | 2  | 2  | 0  | 2  | 0  | 2  | 0  | 0  |    |     |     |     | 8           | Fair    |
| Hsieh et al. 2014 [35]       | 2  | 0  | 2  | 2  | 1  | 2  | 0  | 0  |    |     |     |     | 9           | Fair    |
| Kastoer et al. 2019 [36]     | 2  | 0  | 2  | 2  | 1  | 2  | 2  | 0  |    |     |     |     | 11          | Fair    |
| Li et al. 1999 [39]          | 0  | 2  | 0  | 2  | 0  | 2  | 2  | 0  |    |     |     |     | 8           | Fair    |
| Li et al. 2000 [38]          | 2  | 2  | 0  | 2  | 0  | 2  | 0  | 0  |    |     |     |     | 8           | Fair    |
| Li et al. 2001 [40]          | 2  | 2  | 0  | 2  | 0  | 2  | 0  | 0  |    |     |     |     | 8           | Fair    |
| Li et al. 2002 [37]          | 2  | 1  | 2  | 2  | 0  | 2  | 0  | 0  |    |     |     |     | 9           | Fair    |
| Liao et al. 2015 [41]        | 2  | 2  | 2  | 2  | 1  | 2  | 0  | 0  |    |     |     |     | 11          | Fair    |
| Lin et al. 2020 [42]         | 2  | 2  | 2  | 2  | 1  | 2  | 0  | 0  |    |     |     |     | 11          | Fair    |
| Liu et al. 2016 [11]         | 2  | 2  | 0  | 2  | 1  | 2  | 0  | 0  |    |     |     |     | 9           | Fair    |
| Rubio-Bueno et al. 2017 [43] | 2  | 2  | 2  | 2  | 1  | 2  | 0  | 0  |    |     |     |     | 11          | Fair    |
| Veys et al. 2017 [44]        | 2  | 2  | 2  | 2  | 0  | 2  | 0  | 0  |    |     |     |     | 10          | Fair    |
| Vicini et al. 2010 [45]      | 2  | 2  | 2  | 2  | 1  | 2  | 2  | 0  |    |     |     |     | 13          | High    |
| Vigneron et al. 2017 [46]    | 2  | 2  | 0  | 2  | 1  | 2  | 0  | 0  |    |     |     |     | 9           | Fair    |
| Wu et al. 2019 [47]          | 2  | 2  | 0  | 2  | 1  | 2  | 0  | 0  | 0  | 2   | 0   | 2   | 13          | Fair    |

| (b)                             |    |    |    |    |    |    |    |    |             |         |
|---------------------------------|----|----|----|----|----|----|----|----|-------------|---------|
|                                 | Q1 | Q2 | Q3 | Q4 | Q5 | Q6 | Q7 | Q8 | Total score | Quality |
| Bachour et al. 2021 [55]        | 2  | 2  | 0  | 2  | 0  | 2  | 2  | 0  | 10          | Fair    |
| Heiser et al. 2017 [48]         | 2  | 2  | 2  | 2  | 0  | 2  | 0  | 0  | 10          | Fair    |
| Philip et al. 2018 [49]         | 2  | 0  | 2  | 2  | 1  | 2  | 0  | 0  | 9           | Fair    |
| Steffen et al. 2019 [50]        | 2  | 2  | 0  | 2  | 0  | 2  | 0  | 0  | 8           | Fair    |
| Steffen et al. 2020 [51]        | 2  | 2  | 2  | 2  | 0  | 2  | 0  | 0  | 8           | Fair    |
| Suurna et al. 2021 [54]         | 2  | 2  | 2  | 2  | 0  | 2  | 0  | 0  | 10          | Fair    |
| Van de Heyning et al. 2012 [52] | 2  | 2  | 2  | 2  | 1  | 2  | 2  | 0  | 13          | High    |
| Vanderveken et al. 2013 [53]    | 2  | 0  | 2  | 2  | 1  | 2  | 0  | 0  | 9           | Fair    |
| Woodson et al. 2018 [15]        | 2  | 0  | 2  | 2  | 1  | 2  | 0  | 0  | 9           | Fair    |

Q1, a clear study aim; Q2, inclusion of consecutive patients; Q3, prospective collection of data; Q4, endpoint appropriate to the aim of the study; Q5, unbiased assessment of the study; Q6, follow-up period appropriate to the aim of the study endpoint; Q7, loss of follow-up less than 5%; Q8, prospective calculation of the study size; Q9, an adequate control group; Q10, contemporary group; Q11, baseline equivalent of groups; Q12, adequate statistical analysis.
